# Supplementary material for: Lytic transglycosylase MltG cleaves in nascent peptidoglycan and produces short glycan strands
Source: PubMed Central journal article supplement (PMC8135044; doi:10.1016/j.tcsw.2021.100053), 2021-05-01
Supplement: mmc1.pdf [file mmc1.pdf]

## SUPPLEMENTARY DATA

### **Lytic transglycosylase MltG cleaves in nascent peptidoglycan and produces short glycan strands**

Jad Sassine<sup>1‡</sup>, Manuel Pazos<sup>1</sup>, Eefjan Breukink<sup>2</sup>, and Waldemar Vollmer<sup>1\*</sup>.

<sup>1</sup>Centre for Bacterial Cell Biology, Biosciences Institute, Faculty of Medical Sciences, Newcastle University, Newcastle upon Tyne, UK.

<sup>2</sup>Membrane Biochemistry and Biophysics, Bijvoet Centre of Biomolecular Research, Department of Chemistry, Faculty of Science, Utrecht University, Utrecht, Netherlands.

<sup>‡</sup> Current address: Department of Biochemistry, University of Oxford, Oxford, UK.

\* To whom correspondence may be addressed. E-mail: Waldemar.vollmer@ncl.ac.uk

## Index

### Supplementary figures

- Fig. S1. Amino acid sequence alignment of *BsSleB*, *BsMltG*, *EcMltG* and *LmMltG*.
- Fig. S2. *BsMltG* interacts with *BsPBP2B*.
- Fig. S3. RP-HPLC analysis of muropeptides produced from *B. subtilis* PG digest with *BsMltG* and/or cellosyl.
- Fig. S4. HPLC chromatograms corresponding to data shown in Figure 1B.
- Fig. S5. Lytic transglycosylase activity of *BsMltG*.
- Fig. S6. HPLC chromatograms corresponding to data shown in Figure 2A.
- Fig. S7. HPLC chromatograms corresponding to data shown in Figure 2B.
- Fig. S8. HPLC chromatograms corresponding to data shown in Figure 3.
- Fig. S9. MltG has no effect on the GTase activity of PBPs.

### Supplementary tables

- Table S1. List of strains.
- Table S2. List of plasmids.
- Table S3. List of primers.

## References

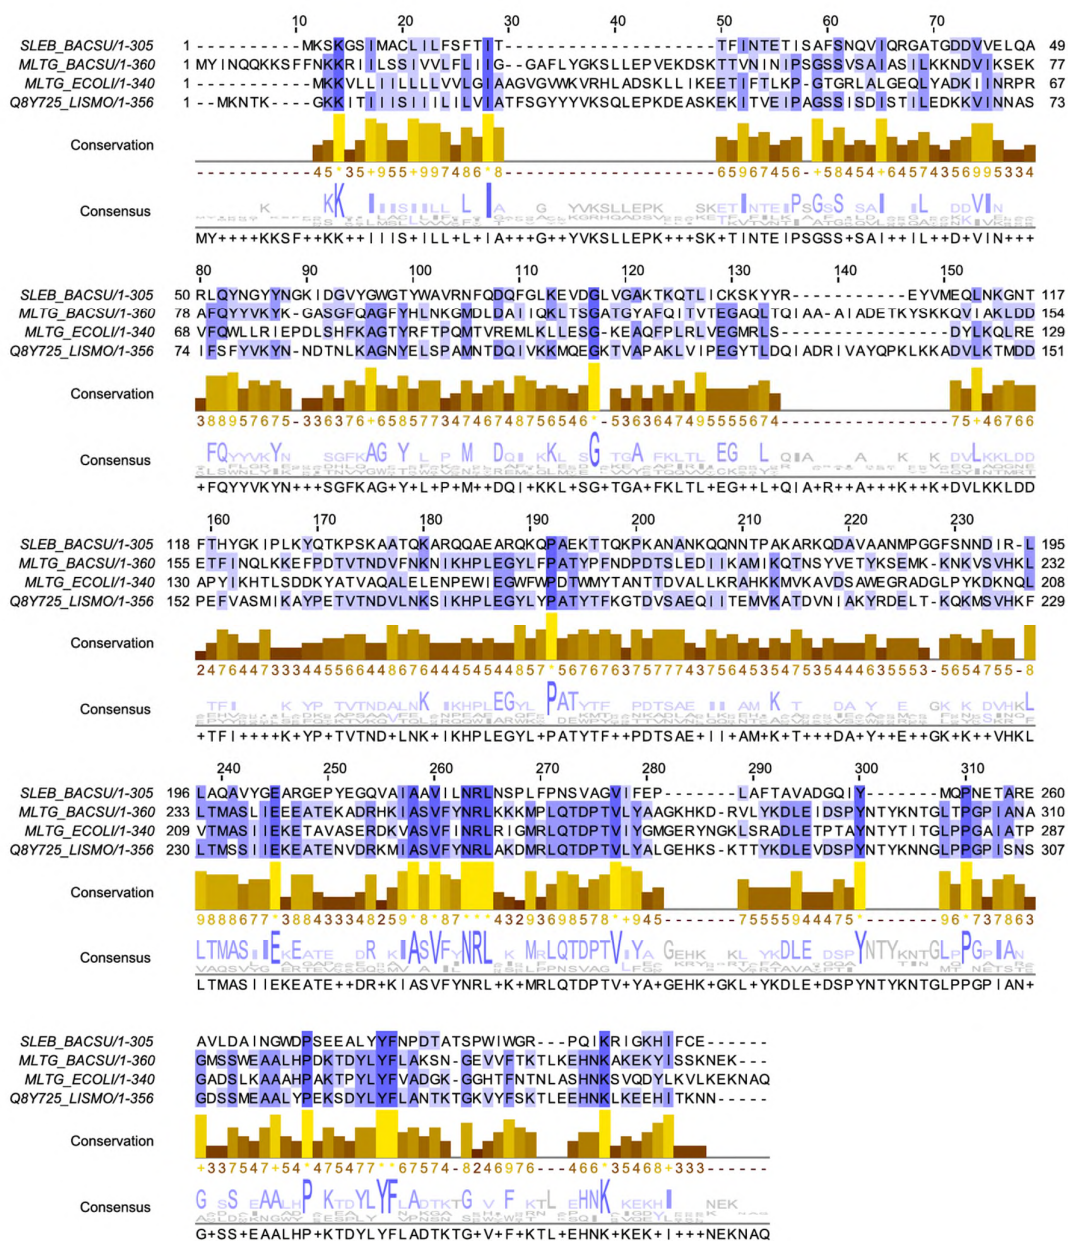

**Figure S1. Amino acid sequence alignment for *BsSleB*, *BsMltG*, *EcMltG* and *LmMltG*.**  
 The LysM domain is predicted to range from residues 50 to 135, and LT domain from 150 to 340. The active site glutamate residue E218 in *EcMltG* is conserved across species (Yunck *et al.*, 2016).

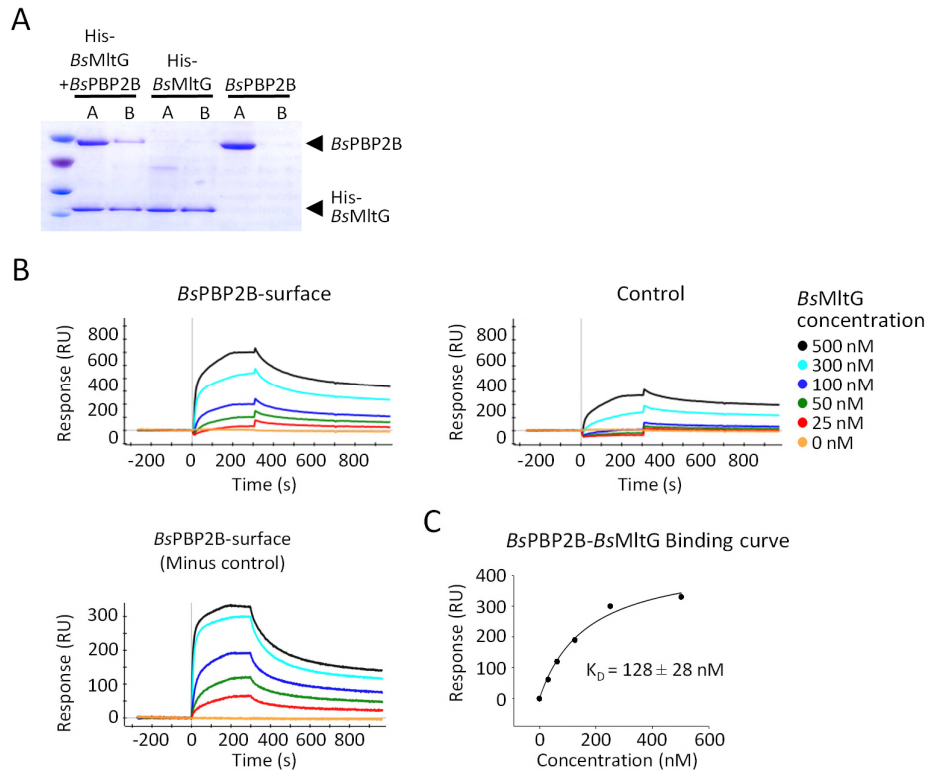

**Figure S2. *BsMltG* interacts with *BsPBP2B*.**

(A) Pull-down assays performed to test if *BsMltG* interacts with *BsPBP2B*. Coomassie stained SDS-PAGE analysis showing that His-*BsMltG* and *BsPBP2B* were detected in both the applied and the bound fractions suggesting that His-*BsMltG* pull-down *BsPBP2B*. A, applied fraction; B, bound fractions. (B) SPR sensorgrams showing the response for *BsMltG* when injected over a surface with immobilized *BsPBP2B* or a control surface, plotted against time. The signal for the *BsPBP2B*-surface was higher than for the control surface upon *BsMltG* injection. (C) The response values during equilibrium were plotted against injected *BsMltG* concentrations. The  $K_D$  of the *BsPBP2B*-*BsMltG* interaction was determined by non-linear regression using Sigma Plot software and given as mean  $\pm$  standard deviation of three independent experiments.

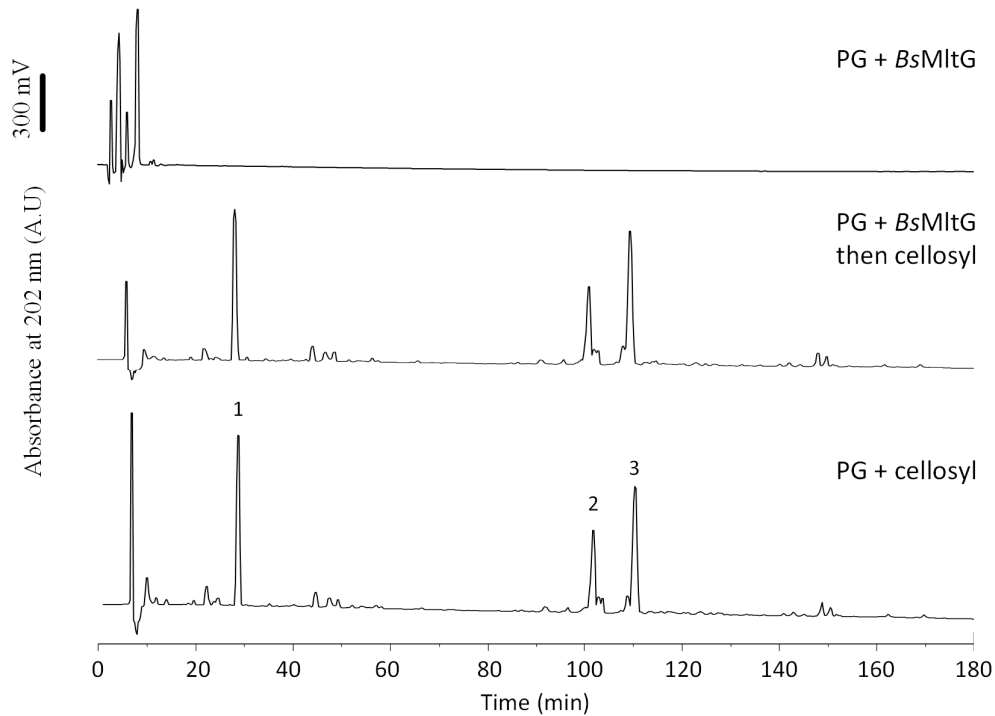

**Figure S3. RP-HPLC analysis of mucopeptides produced from *B. subtilis* PG digest with *BsMltG* and/or cellosyl.**

PG from *B. subtilis* was incubated with *BsMltG* and the sample was reduced with sodium borohydride and analysed by HPLC (Top chromatogram). As a control sample, the PG was incubated with *BsMltG* and then digested with cellosyl, followed by reduction and HPLC analysis (Middle chromatogram). As another control sample, *B. subtilis* PG was digested with cellosyl followed by reduction and HPLC analysis. Elution chromatograms were similar to previously published chromatograms of mucopeptides generated from wild type *B. subtilis* PG digests (Atrih *et al.*, 1999; Sassine *et al.*, 2020). PG digested with *BsMltG* did not release mucopeptides, on the contrary to PG digest by *BsMltG* and cellosyl, suggesting that *BsMltG* is inactive against PG. Peaks eluting between 0 and 10 min correspond to buffers components. The major eluted peaks correspond to: 1, Tri(NH<sub>2</sub>), GlcNAc-MurNAc(r)-L-Ala-D-Glu-meso-diaminopimelic acid (amidated); 2, TetraTri(NH<sub>2</sub>), bis-disaccharide tetratripeptide with amidation of one of the m-Dap residues; 3, TetraTri(NH<sub>2</sub>)<sub>2</sub>, bis-disaccharide tetratripeptide with amidation of both m-Dap residues.

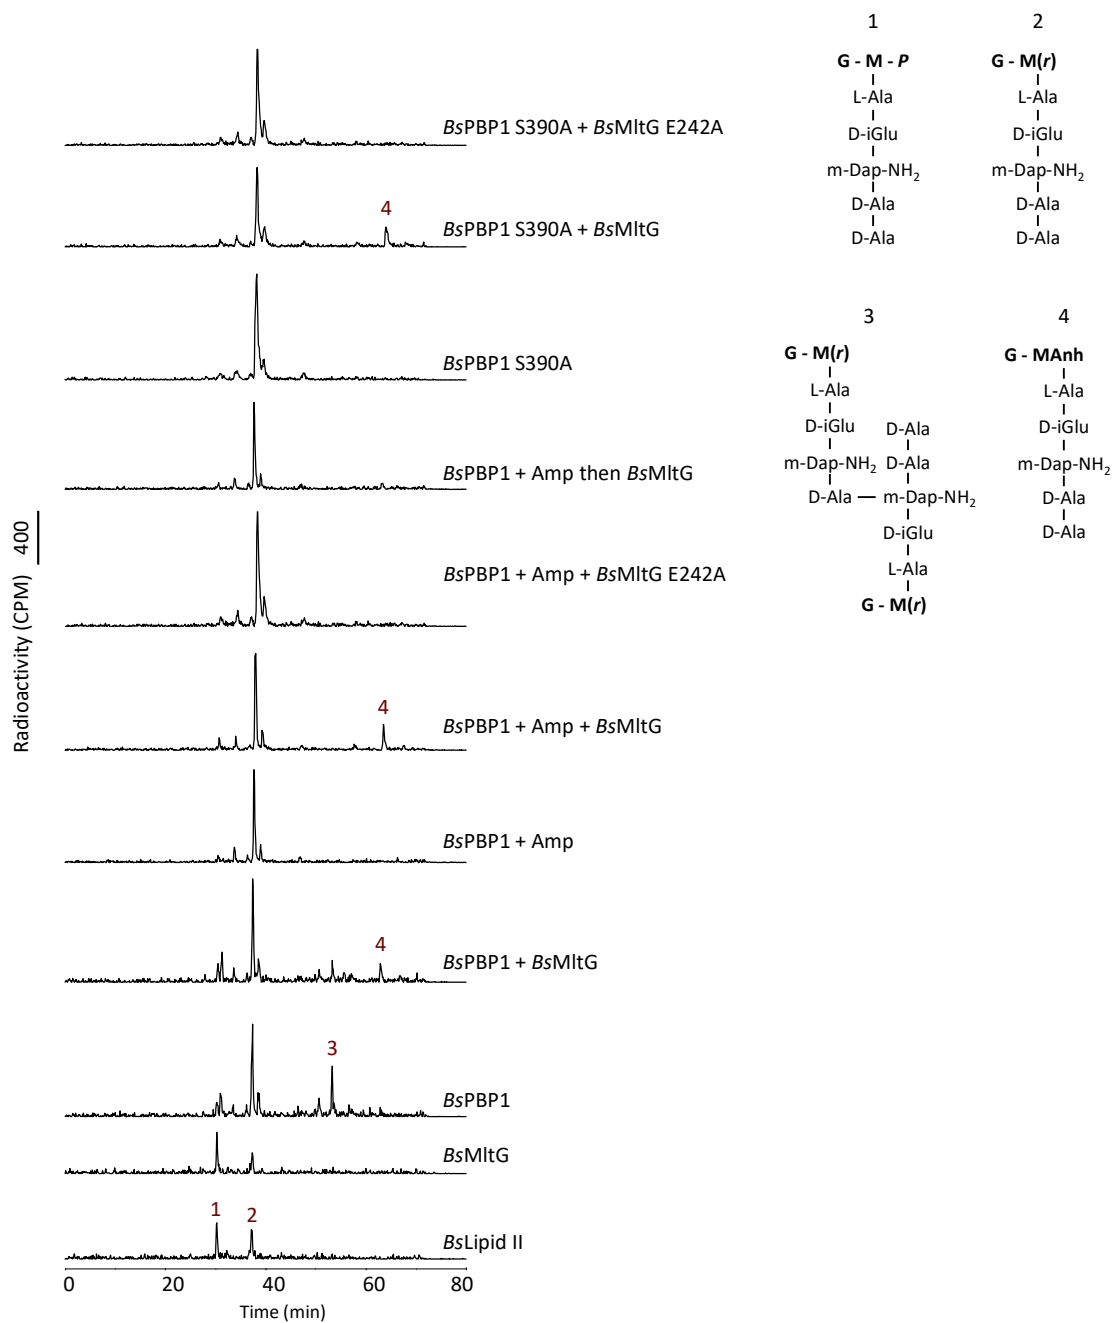

**Figure S4. HPLC chromatograms corresponding to data shown in Figure 1B.**

HPLC analysis of new peptidoglycan synthesised by *BsPBP1* or *BsPBP1* S390A in the presence or absence of ampicillin and *BsMltG* or *BsMltG* E242A. The PG was digested with cellosyl, reduced with sodium borohydride and separated by HPLC. Muuropeptide structures are shown next to the chromatograms. Muuropeptide 3 is a TP product, muuropeptide 4 is an LT product. G, *N*-acetylglucosamine; M(r), *N*-acetylmuramitol; P, phosphate; MAnh, 1,6-anhydro-*N*-acetylmuramic acid; L-Ala, L-alanine; D-Ala, D-alanine; D-iGlu, D-iso-glutamate; m-Dap, meso-2,6-diaminopimelic acid; NH<sub>2</sub>, amido group at m-Dap (amidation).

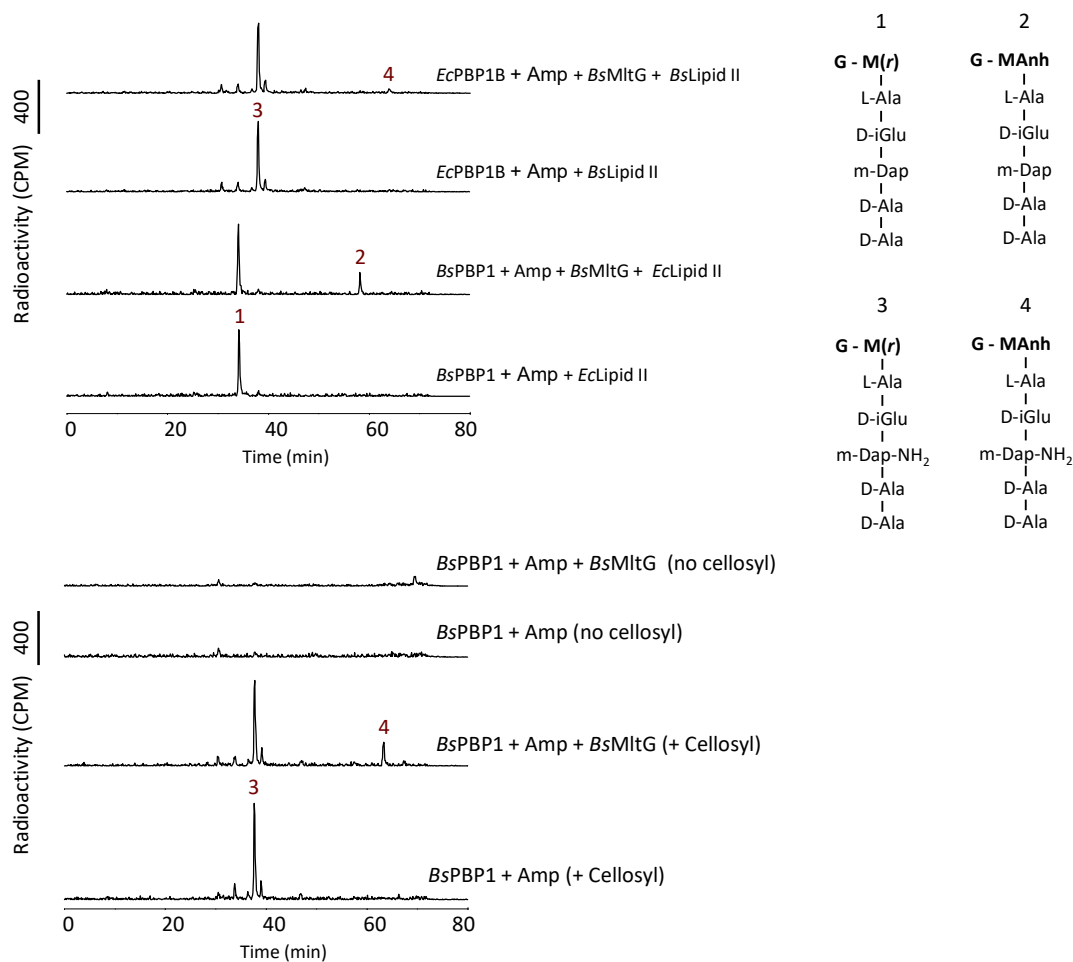

**Figure S5. Lytic transglycosylase activity of *BsMltG*.**

HPLC analysis of new peptidoglycan synthesised by *BsPBP1* or *EcPBP1B* using *E. coli* or *B. subtilis* lipid II in the presence or absence of ampicillin, *BsMltG* and *BsMltG* E242A. Muropeptide structures are shown next to the chromatograms. Muropeptides 2 and 4 are LT products. *BsMltG* showed a significantly higher activity when tested in the presence of *BsPBP1* compared to *EcPBP1B*, suggesting that *BsMltG* favours ongoing PG synthesis by *BsPBP1* for activity. *BsMltG* products are detectable only after further cleaving the glycan material by cellosyl showing that *BsMltG* is an endo-enzyme cleaving glycosidic bonds within the glycan strands. G, *N*-acetylglucosamine; M(r), *N*-acetylmuramitol; MAnh, 1,6-anhydro-*N*-acetylmuramic acid; L-Ala, L-alanine; D-Ala, D-alanine; D-iGlu, D-iso-glutamate; m-Dap, meso-2,6-diaminopimelic acid; NH<sub>2</sub>, amido group.

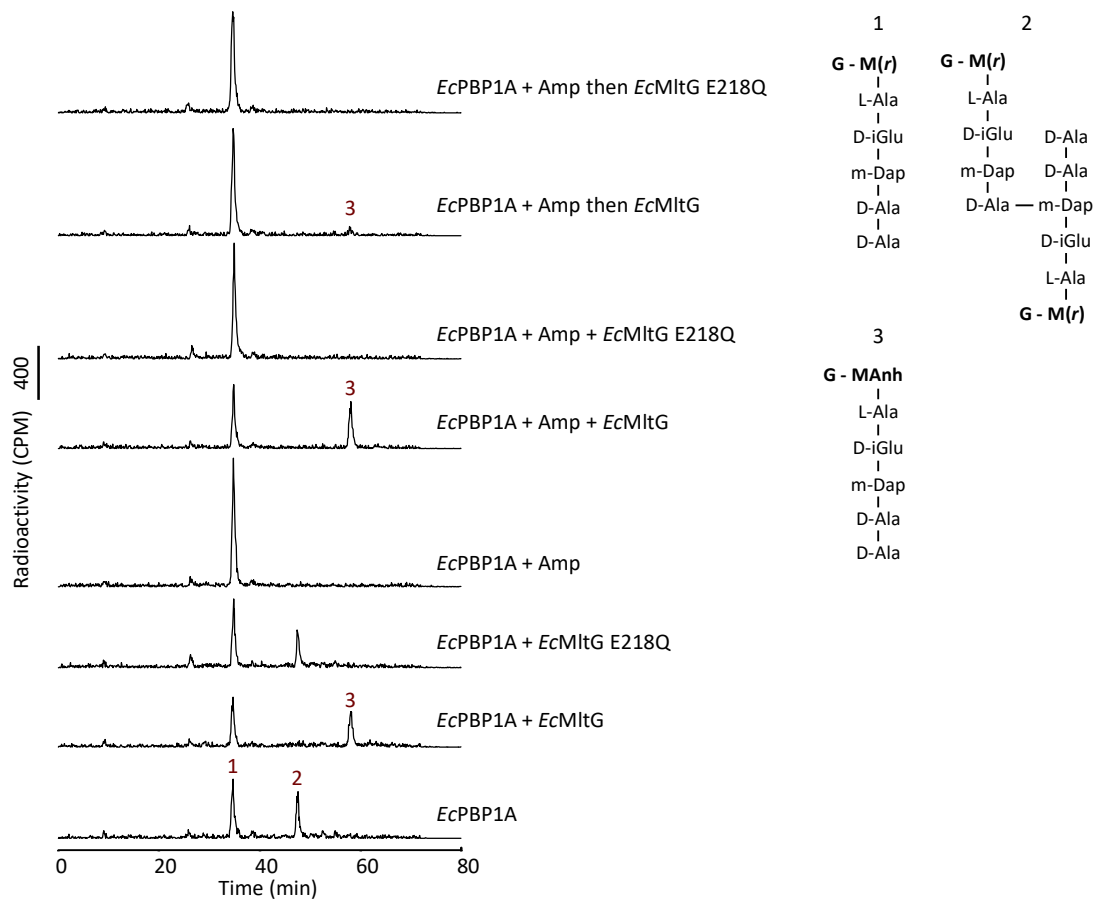

**Figure S6. HPLC chromatograms corresponding to data shown in Figure 2A.**

HPLC analysis of new peptidoglycan synthesised by *EcPBP1A* in the presence or absence of ampicillin and *EcMltG* or *EcMltG E218Q*. The PG was digested with cellosyl, reduced with sodium borohydride and separated by HPLC. Mucopeptide structures are shown next to the chromatograms. Mucopeptide 2 is a TP product, mucopeptide 3 is an LT product. G, *N*-acetylglucosamine; M(r), *N*-acetylmuramitol; MAnh, 1,6-anhydro-*N*-acetylmuramic acid; L-Ala, L-alanine; D-Ala, D-alanine; D-iGlu, D-iso-glutamate; m-Dap, meso-2,6-diaminopimelic acid.



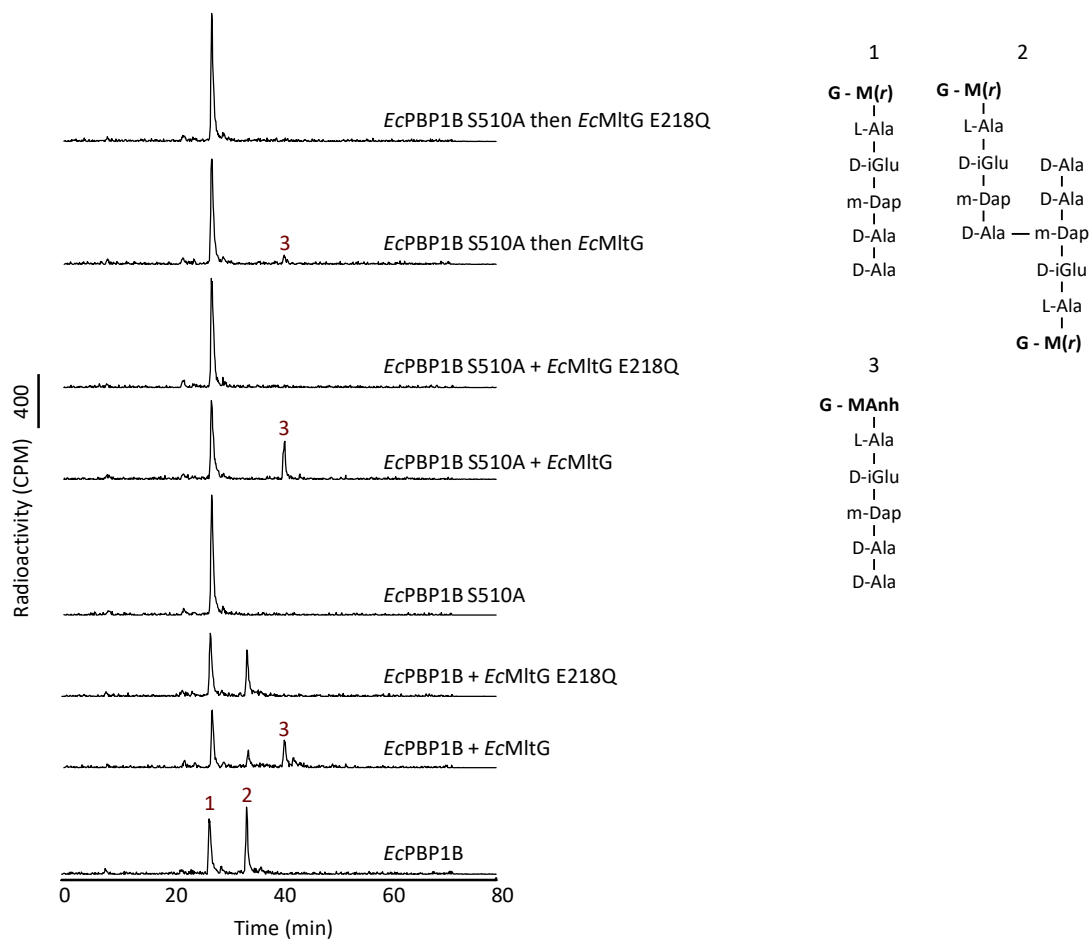

**Figure S7. HPLC chromatograms corresponding to data shown in Figure 2B.**

HPLC analysis of new peptidoglycan synthesised by *EcPBP1B* or *EcPBP1B S510A* in the presence or absence of ampicillin and *EcMltG* or *EcMltG E218Q*. The PG was digested with cellosyl, reduced with sodium borohydride and separated by HPLC. Muropeptide structures are shown next to the chromatograms. Muropeptide 2 is a TP product, muropeptide 3 is an LT product. G, *N*-acetylglucosamine; M(r), *N*-acetylmuramitol; MAnh, 1,6-anhydro-*N*-acetylmuramic acid; L-Ala, L-alanine; D-Ala, D-alanine; D-iGlu, D-iso-glutamate; m-Dap, meso-2,6-diaminopimelic acid.

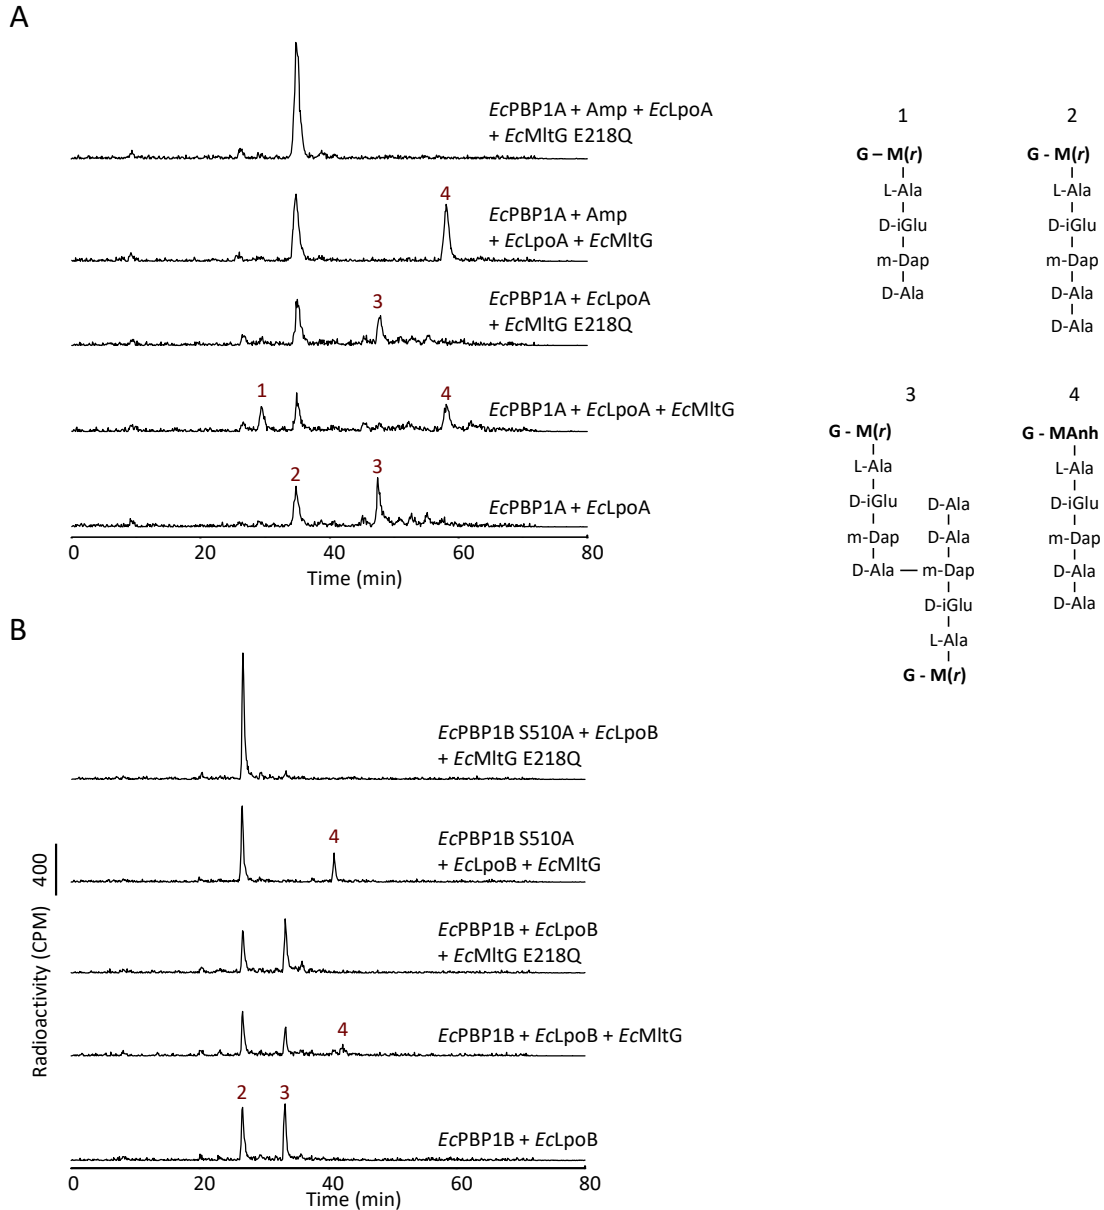

**Figure S8. HPLC chromatograms corresponding to data shown in Figure 3.**

HPLC analysis of new peptidoglycan synthesised by *EcPBP1A*, *EcPBP1B* and *EcPBP1B* S510A in the presence or absence of ampicillin and LpoA, LpoB, *EcMltG* or *EcMltG* E218Q. The PG was digested with cellosyl, reduced with sodium borohydride and separated by HPLC. *EcMltG* produced PentaAnh in the presence of (A) *EcPBP1B* and LpoB, and (B) *EcPBP1A* and LpoA. Muropeptide 3 is a TP product, muropeptide 4 is an LT product. G, *N*-acetylglucosamine; M(r), *N*-acetylmuramitol; MAnh, 1,6-anhydro-*N*-acetylmuramic acid; L-Ala, L-alanine; D-Ala, D-alanine; D-iGlu, D-iso-glutamate; m-Dap, meso-2,6-diaminopimelic acid.

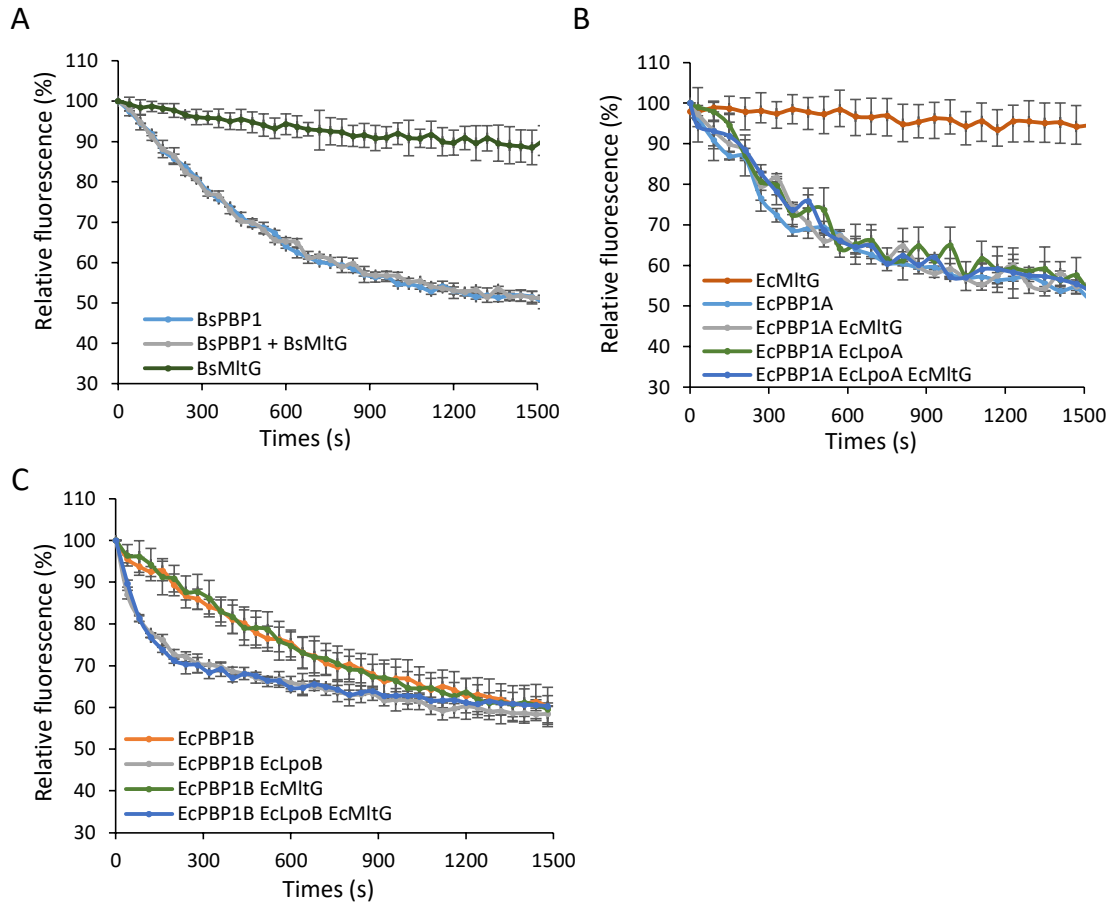

**Figure S9. MltG has no effect on the GTase activity of PBPs.**

Plots represent the GTase activity of *BsPBP1*, *EcPBP1B* or *EcPBP1A* in the presence of LpoA, LpoB, *BsMltG* and/or *EcMltG*, using fluorescent dansyl-lipid II as substrate. GTase activity causes a decrease in the fluorescence signal over time. *BsMltG* or *EcMltG* were inactive against dansyl-lipid II. *BsMltG* had no effect on the GTase activity of *BsPBP1*. *EcMltG* had no effect on the GTase activity of *EcPBP1A* or *EcPBP1B*. *EcMltG* had no effect on the activation of *EcPBP1B* by LpoB. Values represent the mean  $\pm$  standard deviation of three independent experiments.

**Table S1. List of strains.**

| <b>Strain</b>               | <b>Genotype</b>                                                                                                                                                                                                                                                                             | <b>Source/Comment</b>       |
|-----------------------------|---------------------------------------------------------------------------------------------------------------------------------------------------------------------------------------------------------------------------------------------------------------------------------------------|-----------------------------|
| DH5 $\alpha$                | <i>E. coli</i> F <sup>-</sup> $\phi$ 80 <i>lacZ</i> $\Delta$ M15, $\Delta$ ( <i>lacZYArgF</i> )U196, <i>recA1</i> , <i>endA1</i> , <i>hsdR17</i> , ( <i>r<sub>k-</sub></i> , <i>m<sub>k+</sub></i> ), <i>phoA</i> , <i>supE44</i> , $\lambda$ , <i>thi-1</i> , <i>gyrA96</i> , <i>relA1</i> | Invitrogen                  |
| BL21(DE3)                   | <i>E. coli</i> B F <sup>-</sup> <i>ompT gal dcm lon hsdS<sub>B</sub></i> ( <i>r<sub>B-</sub></i> <i>m<sub>B-</sub></i> ) $\lambda$ (DE3 [ <i>lacI lacUV5-T7p07 ind1 sam7 nin5</i> ]) [ <i>malB<sup>+</sup></i> ] <sub>K-12</sub> ( $\lambda^S$ )                                            | Novagen                     |
| <i>B. subtilis</i><br>168CA | <i>trpC2</i>                                                                                                                                                                                                                                                                                | Laboratory collection       |
| <i>E. coli</i><br>BW25113   | Wild type strain                                                                                                                                                                                                                                                                            | (Datsenko and Wanner, 2000) |

**Table S2. List of plasmids.**

| <b>Plasmid</b>               | <b>Characteristics</b>                     | <b>Reference/Source</b>                            |
|------------------------------|--------------------------------------------|----------------------------------------------------|
| pET-28a(+)                   | <i>kan P<sub>T7</sub> lacI</i>             | Novagen                                            |
| pET28-28a(+>:: <i>ponA</i> ) | <i>kan P<sub>T7</sub> ponA lacI</i>        | (Cleverley et al., 2016;<br>Rismondo et al., 2016) |
| pJS07                        | <i>kan P<sub>T7</sub> pbpB lacI</i>        | This work                                          |
| pJS11                        | <i>kan P<sub>T7</sub> ponA(S390A) lacI</i> | This work                                          |
| pJS12                        | <i>kan P<sub>T7</sub> yrrL lacI</i>        | This work                                          |
| pJS136                       | <i>kan P<sub>T7</sub> yrrL E242A lacI</i>  | This work                                          |
| pJS154                       | <i>kan P<sub>T7</sub> mltG lacI</i>        | This work                                          |
| pJS158                       | <i>kan P<sub>T7</sub> mltG E218Q lacI</i>  | This work                                          |
| pDML924                      | <i>kan P<sub>T7</sub> mrcB lacI</i>        | (Terrak et al., 1999)                              |
| pDML924(S510A)               | <i>kan P<sub>T7</sub> mrcB S510A lacI</i>  | (Leclercq et al., 2017)                            |
| pLpoB <sup>sol</sup>         | <i>kan P<sub>T7</sub> lpoB lacI</i>        | (Typas et al., 2010)                               |
| pTK1Ahis                     | <i>kan P<sub>T7</sub> mrcA lacI</i>        | (Born et al., 2006)                                |
| pET28-HisLpoA(sol)           | <i>kan P<sub>T7</sub> lpoA lacI</i>        | (Typas et al., 2010)                               |

**Table S3. List of primers.**

| Name  | 5'-3' oligonucleotide sequence                         | Reference/comment                                |
|-------|--------------------------------------------------------|--------------------------------------------------|
| JS128 | ATGGCTAGCATGACTGGTGGAC                                 | To PCR amplify pET-28a(+)                        |
| JS129 | ATGGCTGCCGCGCGGCACCAG                                  | To PCR amplify pET-28a(+)                        |
| JS134 | CTGGTGCCGCGCGGCAGCCATATGTAT<br>ATCAATCAGCAAAAAAAAAATCG | 5' <i>yrrL</i> (construction of pJS12)           |
| JS135 | TGTCCACCAGTCATGCTAGCCATGCGG<br>AAAGCGAACAAAAGGAGAG     | 3' <i>yrrL</i> (construction of pJS12)           |
| JS155 | GTCGGCTTTTTTCAGTCGCTGCTTCTTCT<br>ATCAAAGAAGC           | To construct pJS136 by side-directed mutagenesis |
| JS156 | GCTTCTTTGATAGAAGAAGCAGCGACT<br>GAAAAAGCCGAC            | To construct pJS136 by side-directed mutagenesis |
| JS190 | CTGGTGCCGCGCGGCAGCCATATGAAA<br>AAAGTGTTATTGATAATCT     | 5' <i>mltG</i> (construction of pJS154)          |
| JS191 | TGTCCACCAGTCATGCTAGCCATCTCAA<br>TGACGATATACTTACTG      | 3' <i>mltG</i> (construction of pJS154)          |
| JS193 | GACGATGGCATCAATTATCGAAAAACA<br>GACCGCCGTTGCCA          | To construct pJS158 by side-directed mutagenesis |
| JS194 | TGGCAACGGCGGTCTGTTTTTCGATAAT<br>TGATGCCATCGTC          | To construct pJS158 by side-directed mutagenesis |

## References

- Atrih, A., Bacher, G., Williamson, M.P., Foster, S.J., 1999. Analysis of peptidoglycan structure from vegetative cells of *Bacillus subtilis* 168 and role of PBP 5 in peptidoglycan maturation. *J. Bacteriol.* 181, 3956–3966. <https://jb.asm.org/content/181/13/3956>
- Born, P., Breukink, E., Vollmer, W., 2006. In vitro Ssynthesis of Ccross-linked murein and its attachment to sacculi by PBP1A from *Escherichia coli*. *J. Biol. Chem.* 281, 26985–26993. <https://doi.org/10.1074/jbc.M604083200>
- Cleverley, R.M., Rismondo, J., Lockhart-Cairns, M.P., Van Bentum, P.T., Egan, A.J.F., Vollmer, W., Halbedel, S., Baldock, C., Breukink, E., Lewis, R.J., 2016. Subunit arrangement in GpsB, a regulator of cell wall biosynthesis. *Microb. Drug Resist.* 22, 446–460. <https://doi.org/10.1089/mdr.2016.0050>
- Datsenko, K.A., Wanner, B.L., 2000. One-step inactivation of chromosomal genes in *Escherichia coli* K-12 using PCR products. *Proc. Natl. Acad. Sci.* 97, 6640–6645. <https://doi.org/10.1073/pnas.120163297>
- Leclercq, S., Derouaux, A., Olatunji, S., Fraipont, C., Egan, A.J.F., Vollmer, W., Breukink, E., Terrak, M., 2017. Interplay between Penicillin-binding proteins and SEDS proteins promotes bacterial cell wall synthesis. *Sci. Rep.* 7, 43306. <https://doi.org/10.1038/srep43306>
- Rismondo, J., Cleverley, R.M., Lane, H. V, Großhennig, S., Steglich, A., Möller, L., Mannala, G.K., Hain, T., Lewis, R.J., Halbedel, S., 2016. Structure of the bacterial cell division determinant GpsB and its interaction with penicillin-binding proteins. *Mol. Microbiol.* 99, 978–998. <https://doi.org/10.1111/mmi.13279>
- Sassine, J., Sousa, J., Lalk, M., Daniel, R.A., Vollmer, W., 2020. Cell morphology maintenance in *Bacillus subtilis* through balanced peptidoglycan synthesis and hydrolysis. *Sci. Rep.* 10, 17910. <https://doi.org/10.1038/s41598-020-74609-5>
- Terrak, M., Ghosh, T.K., Van Heijenoort, J., Van Beeumen, J., Lampilas, M., Aszodi, J., Ayala, J.A., Ghuysen, J.M., Nguyen-Distèche, M., 1999. The catalytic, glycosyl transferase and acyl transferase modules of the cell wall peptidoglycan-polymerizing penicillin-binding protein 1b of *Escherichia coli*. *Mol. Microbiol.* 34, 350–364. <https://doi.org/10.1046/j.1365-2958.1999.01612.x>
- Typas, A., Banzhaf, M., Van Den Berg Van Saparoea, B., Verheul, J., Biboy, J., Nichols, R.J., Zietek, M., Beilharz, K., Kannenberg, K., Von Rechenberg, M., Breukink, E., Den Blaauwen, T., Gross, C.A., Vollmer, W., 2010. Regulation of peptidoglycan synthesis by outer-membrane proteins. *Cell.* 143:1097–109. <https://doi.org/10.1016/j.cell.2010.11.038>
- Yunck, R., Cho, H., Bernhardt, T.G., 2016. Identification of MltG as a potential terminase for peptidoglycan polymerization in bacteria. *Mol. Microbiol.* 99, 700–718. <https://doi.org/10.1111/mmi.13258>
